# Supplementary material
Source: publisher site journal article supplement (https://www.dovepress.com/article/292354)
Supplement: Supplementary file 1 [file get_supplementary_file.php]

**Table S1: Association between participants’ demographic characteristics and attitudinal statements***

| **Attitude statement** | **A1** | | | **P value**** | **A2** | | | **P value**** | **A3** | | | **P value**** |
| --- | --- | --- | --- | --- | --- | --- | --- | --- | --- | --- | --- | --- |
| **Variables** | **Yes** | **No** | **Not sure** |  | **Yes** | **No** | **Not sure** |  | **Yes** | **No** | **Not sure** |  |
| **Gender** | | | | | | | | | | | | |
| Male | 65(73.0) | 9(10.1) | 15 (16.9) | 0.234 | 66(74.2 ) | 11(12.4) | 12 (13.5) | 0.222 | 81(91) | 3 (3.4) | 5(5.6) | 0.601 |
| Female | 100 (69.9) | 8 (5.6) | 35 (24.5) | 97 (67.8) | 14 (9.8) | 32(22.4) | 135(94.4) | 3 (2.1) | 5 (3.5) |
| **Age** | | | | | | | | | | | | |
| 19-21 | 44(68.8) | 4(6.3) | 16(25) | 0.665 | 47(73.4) | 3(4.7) | 14(21.9) | 0.445 | 58(90.6) | 0(0.00) | 6(9.4) | 0.054 |
| 22-24 | 95(69.9) | 11(8.1) | 30(22.1) | 93(68.4) | 18(13.2) | 25(18.4%) | 128(94.1) | 4(2.9) | 4(2.9) |
| ≥ 25 | 26(81.3) | 2(6.3) | 4(12.5) | 23(71.9) | 4(12.5) | 5(15.6) | 30(93.8) | 2(6.3) | 0(0.00) |
| **Year** | | | | | | | | | | | | |
| 2nd | 26 (66.7) | 2(5.1) | 11(28.2) | 0.901 | 28 (71.8) | 2 (5.1) | 9 (23.1) | 0.655 | 37(94.9) | 0(0.0) | 2 (5.1) | 0.277 |
| 3rd | 26 (74.3) | 2 (5.7) | 7 (20.0) | 23 (65.7) | 3(8.6) | 9(25.7) | 31(88.6) | 1(2.9) | 3(8.6) |
| 4th | 36 (65.5) | 6 (10.9) | 13 (23.6) | 39(70.9) | 9(16.4) | 7(12.7) | 52(94.5) | 1(1.8) | 2(3.6) |
| 5th | 30 (76.9) | 3 (7.7) | 6(15.4) | 26(66.7) | 5(12.8) | 8(20.5) | 35(89.7) | 1 (2.6) | 3 (7.7) |
| 6th | 47(73.4) | 4 (6.3) | 13 (20.3) | 47(73.4) | 6(9.4) | 11(17.2) | 61(95.3) | 3 (4.7) | 0 (0.0) |
| **Coexisting disease** | | | | | | | | | | | | |
| Yes | 14(77.8) | 0 (0.0) | 4 (22.2) | 0.646 | 12(66.7) | 1(5.6) | 5(27.8) | 0.578 | 16(88.9) | 1(5.6) | 1(5.6) | 0.356 |
| No | 151(70.6) | 17(7.9) | 46(21.5) | 151(70.6) | 24(11.2) | 39(18.2) | 200(93.5) | 5 (2.3) | 9(4.2) |

**Due to rounding, percentages may not add up to 100%. **Chi-square test and its Fisher’s exact test were used.*

**Table S2: Association between participants’ demographic characteristics and practice statements***

| **practice statement** | **P1** | | **P value**** | **P2** | | **P value**** | **P3** | | | **P value**** |
| --- | --- | --- | --- | --- | --- | --- | --- | --- | --- | --- |
| **Variables** | **Yes** | **No** |  | **Yes** | **No** |  | **Yes** | **No** | **Not sure** |  |
| **Gender** | | | | | | | | | | |
| Male | 19(21.3) | 70(78.7) | 0.005 | 60(67.4) | 29(32.6) | 0.877 | 77(86.5) | 4(4.5) | 8(9.0) | 0.182 |
| Female | 12(8.4) | 131(91.6) | 95(66.4) | 48(33.6) | 134(93.7) | 3(2.1) | 6(4.2) |
| **Age** | | | | | | | | | | |
| 19-21 | 7(10.9) | 57(89.1) | 0.569 | 45 (70.3) | 19 (29.7) | 0.544 | 55 (85.9) | 3(4.7) | 6 (9.4) | 0.495 |
| 22-24 | 18(13.2) | 118(86.8) | 87(64.0) | 49(36.0) | 126(92.6) | 4(2.9) | 6 (4.4) |
| ≥ 25 | 6 (18.8) | 26 (81.3) | 23 (71.9) | 9(28.1) | 30 (93.8) | 0(0.0) | 2 (6.3) |
| **Year** | | | | | | | | | | |
| 2nd | 1(2.6) | 38 (97.4) | 0.303 | 26 (66.7) | 13 (33.3) | 0.969 | 33(84.6) | 2(5.1) | 4(10.3) | 0.406 |
| 3rd | 6 (17.1) | 29 (82.9) | 23 (65.7) | 12 (34.3) | 31(88.6) | 2(5.7) | 2(5.7) |
| 4th | 8(14.5) | 47(85.5) | 36 (65.5) | 19 (34.5) | 49(89.1) | 3(5.5) | 3(5.5) |
| 5th | 6(15.4) | 33(84.6) | 28 (71.8) | 11 (28.2) | 37(94.9) | 0(0.0) | 2(5.1) |
| 6th | 10(15.6) | 54(84.4) | 42(65.6) | 22(34.4) | 61(95.3) | 0(0.0) | 3(4.7) |
| **Coexisting disease** | | | | | | | | | | |
| Yes | 1 (5.6) | 17 (94.4) | 0.311 | 12 (66.7) | 6 (33.3) | 0.989 | 16 (88.9) | 0 (0.0) | 2 (11.1) | 0.480 |
| No | 30(14.0) | 184(86.0) | 143(66.8) | 71(33.2) | 195(91.1) | 7 (3.3) | 12(5.6) |

**Due to rounding, percentages may not add up to 100%. ** Chi-square test and its Fisher’s exact test were used.*

**Table S3: Association between participants’ demographic characteristics and the statements related to impact on COVID-19 on their concentration and studies***

| **statement** | **Impact of COVID-19 on overall concentration** | | | | **P value**** | **Impact of COVID 19 on studies** | | | | | **P value**** |
| --- | --- | --- | --- | --- | --- | --- | --- | --- | --- | --- | --- |
| **Variables** | Not at all | A little bit | Moderately | Extremely |  | Not at all | | A little bit | Moderately | Extremely |  |
| **Gender** | | | | | | | | | | | |
| Male | 33 (37.1) | 29 (32.6) | 17 (19.1) | 10 (11.2) | 0.135 | 17 (19.1) | 29 (32.6) | | 21(23.6) | 22 (24.7) | 0.062 |
| Female | 55 (38.5 ) | 54 (37.8 ) | 29 (20.3) | 5 (3.5) | 34 (23.8) | 46 (32.2) | | 46 (32.2) | 17 (11.9) |
| **Age** | | | | | | | | | | | |
| 19-21 | 22(34.4) | 21(32.8) | 16(25.0) | 5(7.8) | 0.844 | 8(12.5) | 26(40.6) | | 15(23.4) | 15(23.4) | 0.154 |
| 22-24 | 53(39.0) | 49(36.0) | 25(18.4) | 9(6.6) | 36(26.5) | 38(27.9) | | 42(30.9) | 20(14.7) |
| ≥ 25 | 13 (40.6) | 13 (40.6) | 5 (15.6) | 1 (3.1) | 7 (21.9) | 11 (34.4) | | 10 (31.3) | 4 (12.5) |
| **Year** | | | | | | | | | | | |
| 2nd | 16(41.0) | 14(35.9) | 6(15.4) | 3(7.7) | 0.858 | 7 (17.9) | 18 (46.2) | | 6 (15.4) | 8 (20.5) | 0.523 |
| 3rd | 10 (28.6) | 13 (37.1) | 10 (28.6) | 2 (5.7) | 7 (20.0) | 15 (42.9) | | 9 (25.7) | 4 (11.4) |
| 4th | 19 (34.5) | 22(40.0) | 10(18.2) | 4(7.3) | 13(23.6) | 14(25.5) | | 18(32.7) | 10(18.2) |
| 5th | 17 (43.6) | 10 (25.6) | 8 (20.5) | 4 (10.3) | 10(25.6) | 12(30.8) | | 11(28.2) | 6(15.4) |
| 6th | 26 (40.6) | 24 (37.5) | 12 (18.8) | 2 (3.1) | 14(21.9) | 16(25.0) | | 23(35.9) | 11(17.2) |
| **Coexisting disease** | | | | | | | | | | | |
| Yes | 8 (44.4) | 5 (27.8) | 5 (27.8) | 0(0.0) | 0.499 | 5 (27.8) | 8 (44.4) | | 5 (27.8) | 0 (0.0) | 0.230 |
| No | 80 (37.4) | 78 (36.4) | 41 (19.2) | 15 (7.0) | 46(21.5) | 67(31.3) | | 62(29.0) | 39(18.2) |

**Due to rounding, percentages may not add up to 100%. ** Chi-square test and its Fisher’s exact test were used.*
